# Supplementary material for: The effect of journal impact factor, reporting conflicts, and reporting funding sources, on standardized effect sizes in back pain trials: a systematic review and meta-regression
Source: PubMed Central journal article supplement (PMC4663726; doi:10.1186/s12891-015-0825-6), 2015-11-30
Supplement: 12891_2015_825_MOESM2_ESM.pdf [file 12891_2015_825_MOESM2_ESM.pdf]

**Table S1: Included study characteristics**

| Lead author       | Publication year | Title                                                                                                                                                                                                                                                        | Sample size | Extracted |
|-------------------|------------------|--------------------------------------------------------------------------------------------------------------------------------------------------------------------------------------------------------------------------------------------------------------|-------------|-----------|
| Ackerman, W       | 2008             | Pain Relief With Intraarticular or Medial Branch Nerve Blocks in Patients With Positive Lumbar Facet Joint SPECT Imaging: A 12-Week Outcome Study                                                                                                            | 46          | Yes       |
| Ahmed, S          | 2009             | Evaluation of the effects of shortwave diathermy in patients with chronic low back pain                                                                                                                                                                      | 97          | Yes       |
| Akbari, A         | 2008             | The effect of motor control exercise versus general exercise on lumbar local stabilizing muscles thickness: Randomized controlled trial of patients with chronic low back pain                                                                               | 49          | Yes       |
| Albaladejo, C     | 2010             | The Efficacy of a Short Education Program and a Short Physiotherapy Program for Treating Low Back Pain in Primary Care                                                                                                                                       | 348         | No        |
| Anema, J          | 2007             | Multidisciplinary Rehabilitation for Subacute Low Back Pain: Graded Activity or Workplace Intervention or Both?                                                                                                                                              | 112         | No        |
| Attanayake, A     | 2010             | Clinical evaluation of selected yogic procedures in individuals with low back pain                                                                                                                                                                           | 12          | No        |
| Becker, A.        | 2008             | Effects of Two Guideline Implementation Strategies on Patient Outcomes in Primary Care                                                                                                                                                                       | 1261        | Yes       |
| Bello, A          | 2010             | Hydrotherapy versus land-based exercises in the management of chronic low back pain: a comparative study                                                                                                                                                     | 12          | Yes       |
| Ben Salah Frih, Z | 2009             | Efficacy and treatment compliance of a home-based rehabilitation programme for chronic low back pain: A randomized, controlled study                                                                                                                         | 107         | Yes       |
| Bialosky, Joel E  | 2009             | Spinal Manipulative Therapy Has an Immediate Effect on Thermal Pain Sensitivity in People With Low Back Pain: A Randomized Controlled Trial                                                                                                                  | 36          | Yes       |
| Bicalho, E        | 2010             | Immediate effects of a high-velocity spine manipulation in paraspinal muscles activity of nonspecific chronic low-back pain subjects                                                                                                                         | 40          | Yes       |
| Birkenmaier, C    | 2007             | Medial branch blocks versus pericapsular blocks in selecting patients for percutaneous cryodenervation of lumbar facet joints                                                                                                                                | 26          | No        |
| Bishop, P         | 2010             | The Chiropractic Hospital-based Interventions Research Outcomes (CHIRO) Study: a randomized controlled trial on the effectiveness of clinical practice guidelines in the medical and chiropractic management of patients with acute mechanical low back pain | 72          | No        |
| Brennan G         | 2006             | Identifying subgroups of patients with acute/subacute "nonspecific" low back pain                                                                                                                                                                            | 123         | Yes       |
| Brinkhaus B       | 2006             | Acupuncture in patients with chronic low back pain                                                                                                                                                                                                           | 284         | No        |

| Lead author        | Publication year | Title                                                                                                                                                                              | Sample size | Extracted |
|--------------------|------------------|------------------------------------------------------------------------------------------------------------------------------------------------------------------------------------|-------------|-----------|
| Cairns M           | 2006             | Randomized controlled trial of specific spinal stabilization exercises and conventional physiotherapy for recurrent low back pain                                                  | 97          | No        |
| Calmels, P         | 2009             | Effectiveness of a Lumbar Belt in Subacute Low Back Pain An Open, Multicentric, and Randomized Clinical Study                                                                      | 190         | Yes       |
| Cecchi, F          | 2010             | Spinal manipulation compared with back school and with individually delivered physiotherapy for the treatment of chronic low back pain: a randomized trial with one-year follow-up | 205         | Yes       |
| Chan, C            | 2011             | Aerobic exercise training in addition to conventional physiotherapy for chronic low back pain: A randomized controlled trial.                                                      | 43          | Yes       |
| Chang, S           | 2008             | Effects of piroxicam-beta-cyclodextrin sachets on abnormal postural sway in patients with chronic low back pain                                                                    | 42          | Yes       |
| Chatzitheodorou, D | 2008             | The effect of exercise on adrenocortical responsiveness of patients with chronic low back pain, controlled for psychological strain.                                               | 61          | Yes       |
| Cherkin, D         | 2011             | A Comparison of the Effects of 2 Types of Massage and Usual Care on Chronic Low Back Pain                                                                                          | 380         | Yes       |
| Cherkin, D         | 2009             | A Randomized Trial Comparing Acupuncture, Simulated Acupuncture, and Usual Care for Chronic Low Back Pain                                                                          | 606         | Yes       |
| Chiu, C            | 2011             | The efficacy and safety of intramuscular injections of methylcobalamin in patients with chronic nonspecific low back pain: a randomised controlled trial                           | 58          | Yes       |
| Chown, M           | 2008             | A prospective study of patients with chronic back pain randomised to group exercise, physiotherapy or osteopathy                                                                   | 98          | Yes       |
| Cleland, J         | 2009             | Comparison of the Effectiveness of Three Manual Physical Therapy Techniques in a Subgroup of Patients With Low Back Pain Who Satisfy a Clinical Prediction Rule                    | 108         | No        |
| Costa, L           | 2009             | Motor Control Exercise for Chronic Low Back Pain: A Randomized Placebo-Controlled Trial                                                                                            | 154         | Yes       |
| Cuesta-Vargas, A   | 2011             | Exercise, Manual Therapy, and Education with or Without High-Intensity Deep-Water Running for Nonspecific Chronic Low Back Pain                                                    | 46          | Yes       |
| da Fonseca, J      | 2009             | Laboratory Gait Analysis in Patients With Low Back Pain Before and After a Pilates Intervention                                                                                    | 28          | Yes       |
| da Silva, A        | 2010             | Evaluation of an Extract of Brazilian Arnica ( <i>Solidago chilensis</i> Meyen, Asteraceae) in Treating Lumbago                                                                    | 20          | No        |

| Lead author     | Publication year | Title                                                                                                                                                                                                                               | Sample size | Extracted |
|-----------------|------------------|-------------------------------------------------------------------------------------------------------------------------------------------------------------------------------------------------------------------------------------|-------------|-----------|
| Demirel, R      | 2008             | Effects of balneotherapy with exercise in patients with low back pain                                                                                                                                                               | 44          | Yes       |
| Demoulin, C     | 2010             | Effectiveness of a semi-intensive multidisciplinary outpatient rehabilitation program in chronic low back pain                                                                                                                      | 160         | No        |
| Diaz Arribas, M | 2009             | Effectiveness of the Physical Therapy Godelive Denys-Struyf Method for Nonspecific Low Back Pain                                                                                                                                    | 126         | Yes       |
| Di Cesare, A    | 2011             | Comparison between the effects of trigger point mesotherapy versus acupuncture points mesotherapy in the treatment of chronic low back pain: A short term randomized controlled trial                                               | 61          | Yes       |
| Djavid, G       | 2007             | In chronic low back pain, low level laser therapy combined with exercise is more beneficial than exercise alone in the long term: a randomised trial                                                                                | 53          | No        |
| Donzelli, S     | 2006             | Two different techniques in the rehabilitation treatment of low back pain: A randomized controlled trial                                                                                                                            | 43          | No        |
| Dufour, N       | 2010             | Treatment of Chronic Low Back Pain A Randomized, Clinical Trial Comparing Group-Based Multidisciplinary Biopsychosocial Rehabilitation and Intensive Individual Therapist-Assisted Back Muscle Strengthening Exercises              | 272         | Yes       |
| Dundar, U       | 2009             | Clinical Effectiveness of Aquatic Exercise to Treat Chronic Low Back Pain                                                                                                                                                           | 65          | Yes       |
| Durmus, D       | 2010             | Effects of therapeutic ultrasound and electrical stimulation program on pain, trunk muscle strength, disability, walking performance, quality of life, and depression in patients with low back pain: a randomized-controlled trial | 59          | Yes       |
| Durmus, D       | 2010             | Effects of Therapeutic Ultrasound on Pain, Disability, Walking Performance, Quality of Life, and Depression in Patients with Chronic Low Back Pain: A Randomized, Placebo Controlled Trial                                          | 42          | No        |
| Durmus, D       | 2009             | Effects of electrical stimulation program on trunk muscle strength, functional capacity, quality of life, and depression in the patients with low back pain: a randomized controlled trial                                          | 43          | Yes       |
| Engbert, K      | 2011             | The Effects of Therapeutic Climbing in Patients with Chronic Low Back Pain                                                                                                                                                          | 23          | Yes       |
| Ergun, H        | 2010             | The efficacy, safety, and pharmacokinetics of intramuscular and oral phenylramidol in patients with low back pain in an emergency department                                                                                        | 72          | No        |
| Ewert, T        | 2009             | The Comparative Effectiveness of a Multimodal Program Versus Exercise Alone for the Secondary Prevention of Chronic Low Back Pain and Disability                                                                                    | 183         | Yes       |

| Lead author  | Publication year | Title                                                                                                                                                                    | Sample size | Extracted |
|--------------|------------------|--------------------------------------------------------------------------------------------------------------------------------------------------------------------------|-------------|-----------|
| Farhadi, K   | 2009             | The effectiveness of wet-cupping for nonspecific low back pain in Iran: A randomized controlled trial                                                                    | 98          | Yes       |
| Ferreira, M. | 2007             | Comparison of general exercise, motor control exercise and spinal manipulative therapy for chronic low back pain: A randomized trial                                     | 224         | Yes       |
| Ferreira, M  | 2009             | Relationship between spinal stiffness and outcome in patients with chronic low back pain                                                                                 | 191         | Yes       |
| Field, T     | 2007             | Lower back pain and sleep disturbance are reduced following massage therapy                                                                                              | 30          | Yes       |
| Fiore, P     | 2011             | Short-term effects of high-intensity laser therapy versus ultrasound therapy in the treatment of low back pain: a randomized controlled trial                            | 30          | No        |
| Franca, F    | 2010             | Segmental stabilization and muscular strengthening in chronic low back pain - a comparative study                                                                        | 30          | Yes       |
| Friedrich, M | 2009             | Long-Term Effect of a Combined Exercise and Motivational Program on the Level of Disability of Patients With Chronic Low Back Pain                                       | 74          | No        |
| Frost H      | 2006             | Randomized controlled trial of physiotherapy compared with advice for low back pain                                                                                      | 200         | No        |
| Gladwell, V  | 2006             | Does a Program of Pilates Improve Chronic Low Back Pain.                                                                                                                 | 34          | Yes       |
| Glazov, G    | 2009             | Laser acupuncture for chronic non-specific low back pain: a controlled clinical trial                                                                                    | 90          | No        |
| Gohner, W    | 2006             | Preventing chronic back pain: evaluation of a theory-based cognitive-behavioural training programme for patients with subacute back pain                                 | 47          | Yes       |
| Goldby L     | 2006             | A randomized controlled trial investigating the efficiency of musculoskeletal physiotherapy on chronic low back disorder                                                 | 200         | Yes       |
| Haake, M     | 2007             | German Acupuncture Trials (GERAC) for Chronic Low Back Pain                                                                                                              | 1117        | Yes       |
| Hagen, E     | 2010             | Adding a physical exercise programme to brief intervention for low back pain patients did not increase return to work                                                    | 246         | No        |
| Hall, A      | 2011             | Tai Chi Exercise for Treatment of Pain and Disability in People With Persistent Low Back Pain: A Randomized Controlled Trial                                             | 160         | Yes       |
| Hancock, M   | 2007             | Assessment of diclofenac or spinal manipulative therapy, or both, in addition to recommended first-line treatment for acute low back pain: a randomised controlled trial | 235         | No        |

| Lead author   | Publication year | Title                                                                                                                                                                                       | Sample size | Extracted |
|---------------|------------------|---------------------------------------------------------------------------------------------------------------------------------------------------------------------------------------------|-------------|-----------|
| Harts, C      | 2008             | A high-intensity lumbar extensor strengthening program is little better than a low-intensity program or a waiting list control group for chronic low back pain: a randomised clinical trial | 59          | Yes       |
| Hartvigsen, J | 2010             | Supervised and non-supervised Nordic walking in the treatment of chronic low back pain: a single blind randomized clinical trial                                                            | 136         | Yes       |
| Henchoz, Y    | 2010             | Role of Physical Exercise in Low Back Pain Rehabilitation A Randomized Controlled Trial of a Three-Month Exercise Program in Patients Who Have Completed Multidisciplinary Rehabilitation   | 103         | Yes       |
| Henchoz, Y    | 2010             | Functional multidisciplinary rehabilitation versus outpatient physiotherapy for non-specific low back pain: randomised controlled trial                                                     | 92          | Yes       |
| Heymans M     | 2006             | The effectiveness of high-intensity versus low-intensity back schools in an occupational setting                                                                                            | 299         | Yes       |
| Hondras, M    | 2009             | A randomized controlled trial comparing 2 types of spinal manipulation and minimal conservative medical care for adults 55 years and older with subacute or chronic low back pain           | 213         | No        |
| Hsieh, L      | 2006             | Treatment of low back pain by acupuncture and physical therapy                                                                                                                              | 110         | Yes       |
| Iles, R       | 2011             | Telephone coaching can increase activity levels for people with non-chronic low back pain: a randomised trial                                                                               | 26          | Yes       |
| Inoue, M      | 2006             | Relief of low back pain immediately after acupuncture treatment - a randomised, placebo controlled trial                                                                                    | 31          | Yes       |
| Johnson, R    | 2007             | Active exercise, education, and cognitive behavioral therapy for persistent disabling low back pain: a randomized controlled trial                                                          | 223         | Yes       |
| Juni, P       | 2009             | A randomised controlled trial of spinal manipulative therapy in acute low back pain                                                                                                         | 104         | No        |
| Kapitza, K    | 2010             | First Non-Contingent Respiratory Biofeedback Placebo versus Contingent Biofeedback in Patients with Chronic Low Back Pain: A Randomized, Controlled, Double-Blind Trial                     | 42          | Yes       |
| Kell, R       | 2011             | The response of persons with chronic nonspecific low back pain to three different volumes of periodized musculoskeletal rehabilitation                                                      | 240         | Yes       |
| Kell, R       | 2009             | A comparison of two forms of periodized exercise rehabilitation programs in the management of chronic nonspecific low-back pain                                                             | 27          | Yes       |

| Lead author     | Publication year | Title                                                                                                                                                                       | Sample size | Extracted |
|-----------------|------------------|-----------------------------------------------------------------------------------------------------------------------------------------------------------------------------|-------------|-----------|
| Kofotolis N     | 2006             | Effects of two 4-week proprioceptive neuromuscular facilitation programs on muscle endurance, flexibility, and functional performance in women with chronic low back pain   | 86          | Yes       |
| Koldas Dogan, S | 2008             | Comparison of three different approaches in the treatment of chronic low back pain                                                                                          | 55          | Yes       |
| Kroll,H         | 2008             | A randomized, double-blind, prospective study comparing the efficacy of continuous versus pulsed radiofrequency in the treatment of lumbar facet syndrome                   | 26          | Yes       |
| Kulisch, A      | 2009             | Effect of thermal water and adjunctive electrotherapy on chronic low back pain: A double blind, randomized, follow up study.                                                | 71          | No        |
| Kumar, S        | 2009             | Efficacy of two multimodal treatments on physical strength of occupationally subgrouped male with low back pain                                                             | 102         | Yes       |
| Kumar, S        | 2010             | Comparative efficacy of two multimodal treatments on male and female sub-groups with low back pain (part II)                                                                | 141         | No        |
| Kumar, S        | 2009             | Efficacy of dynamic muscular stabilization techniques (DMST) over conventional techniques in rehabilitation of chronic low back pain.                                       | 30          | Yes       |
| Lalanne, K      | 2009             | Modulation of the flexion-relaxation response by spinal manipulative therapy: a control group study                                                                         | 27          | Yes       |
| Lamb, S         | 2010             | Group cognitive behavioural treatment for low-back pain in primary care: a randomised controlled trial and cost-effectiveness analysis                                      | 598         | Yes       |
| Lambeek, L      | 2010             | Randomised controlled trial of integrated care to reduce disability from chronic low back pain in working and private life                                                  | 134         | No        |
| Lau, P          | 2008             | Early physiotherapy intervention in an Accident and Emergency Department reduces pain and improves satisfaction for patients with acute low back pain: a randomised trial   | 102         | Yes       |
| Lengsfeld, M    | 2007             | Passive rotary dynamic sitting at the workplace by office-workers with lumbar pain: a randomized multi-center study                                                         | 231         | Yes       |
| Leonhardt, C    | 2007             | TTM-based motivational counselling does not increase physical activity of low back pain patients in a primary care setting - A cluster-randomized controlled trial          | 1261        | Yes       |
| Lewis, C        | 2011             | Strain-Counterstrain therapy combined with exercise is not more effective than exercise alone on pain and disability in people with acute low back pain: a randomised trial | 85          | Yes       |

| Lead author        | Publication year | Title                                                                                                                                                                                                                                   | Sample size | Extracted |
|--------------------|------------------|-----------------------------------------------------------------------------------------------------------------------------------------------------------------------------------------------------------------------------------------|-------------|-----------|
| Little, P          | 2008             | Randomised controlled trial of Alexander technique lessons, exercise, and massage (ATEAM) for chronic and recurrent back pain                                                                                                           | 463         | No        |
| Machado, L         | 2010             | The effectiveness of the mckenzie method in addition to first-line care for acute low back pain: a randomized controlled trial                                                                                                          | 139         | Yes       |
| Mackawan, S        | 2007             | Effects of traditional Thai massage versus joint mobilization on substance P and pain perception in patients with non-specific low back pain                                                                                            | 68          | Yes       |
| Magnussen, L       | 2007             | Motivating disability pensioners with back pain to return to work - A randomized controlled trial                                                                                                                                       | 89          | No        |
| Marshall, P        | 2008             | Muscle Activation Changes After Exercise Rehabilitation for Chronic Low Back Pain                                                                                                                                                       | 50          | No        |
| Marshall, P        | 2008             | Self-Report Measures Best Explain Changes in Disability Compared With Physical Measures After Exercise Rehabilitation for Chronic Low Back Pain                                                                                         | 50          | Yes       |
| Mazza, M           | 2010             | Escitalopram 20 mg versus duloxetine 60 mg for the treatment of chronic low back pain                                                                                                                                                   | 75          | No        |
| Mibielli, M        | 2009             | Diclofenac plus B vitamins versus diclofenac monotherapy in lumbago: the DOLOR study                                                                                                                                                    | 372         | Yes       |
| Mohseni-Bandpei, M | 2006             | A prospective randomised controlled trial of spinal manipulation and ultrasound in the treatment of chronic low back pain                                                                                                               | 112         | No        |
| Mohseni-Bandpei, M | 2011             | The effect of pelvic floor muscle exercise on women with chronic non-specific low back pain                                                                                                                                             | 20          | Yes       |
| Morone, G          | 2011             | Quality of life improved by multidisciplinary back school program in patients with chronic non-specific low back pain: a single blind randomized controlled trial                                                                       | 70          | Yes       |
| Muehlbacher M      | 2006             | Topiramate in Treatment of Patients With Chronic Low Back Pain                                                                                                                                                                          | 96          | Yes       |
| Muller-Schwefe, G  | 2011             | Dysport(registered trademark) for the treatment of myofascial back pain: Results from an open-label, Phase II, randomized, multicenter, dose-ranging study                                                                              | 181         | Yes       |
| Muthukrishnan, R   | 2010             | The differential effects of core stabilization exercise regime and conventional physiotherapy regime on postural control parameters during perturbation in patients with movement and control impairment chronic low back pain research | 30          | No        |
| Nassif, H          | 2011             | Evaluation of a randomized controlled trial in the management of chronic lower back pain in a french automotive industr: An Observational study                                                                                         | 60          | Yes       |

| Lead author        | Publication year | Title                                                                                                                                                                                 | Sample size | Extracted |
|--------------------|------------------|---------------------------------------------------------------------------------------------------------------------------------------------------------------------------------------|-------------|-----------|
| Newcomer, K        | 2008             | Is a videotape to change beliefs and behaviors superior to a standard videotape in acute low back pain? A randomized controlled trial                                                 | 111         | No        |
| Nigg, B            | 2009             | The Effectiveness of an Unstable Sandal on Low Back Pain and Golf Performance                                                                                                         | 37          | No        |
| Noredeman, L       | 2006             | Early access to physical therapy treatment for subacute low back pain in primary health care: a prospective randomized clinical trial                                                 | 60          | Yes       |
| Norris, C          | 2008             | The role of an integrated back stability program in patients with chronic low back pain                                                                                               | 59          | Yes       |
| Oleske, D          | 2007             | Are Back Supports Plus Education More Effective Than Education Alone in Promoting Recovery From Low Back Pain?                                                                        | 433         | No        |
| Pach, D            | 2011             | Efficacy of Injections with Disci/Rhus Toxicodendron Compositum for Chronic Low Back Pain - A Randomized Placebo-Controlled Trial                                                     | 142         | Yes       |
| Paoloni, M         | 2011             | Kinesio taping applied to lumbar muscles influences clinical and electromyographic characteristics in chronic low back patients.                                                      | 39          | Yes       |
| Paolucci, T        | 2011             | Psychological features and outcomes of the Back School treatment in patients with chronic non-specific low back pain. A randomized controlled study                                   | 50          | No        |
| Perez-Palomares, S | 2010             | Percutaneous Electrical Nerve Stimulation Versus Dry Needling: Effectiveness in the Treatment of Chronic Low Back Pain                                                                | 124         | No        |
| Powers, C          | 2008             | Effects of a single session of posterior-to-anterior spinal mobilization and press-up exercise on pain response and lumbar spine extension in people with non-specific low back pain. | 30          | Yes       |
| Rasmussen, J       | 2008             | Manipulation does not add to the effect of extension exercises in chronic low-back pain (LBP). A randomized, controlled, double blind study                                           | 72          | No        |
| Rasmussen-Barr, E  | 2009             | Graded Exercise for Recurrent Low-Back Pain A Randomized, Controlled Trial With 6-, 12-, and 36-Month Follow-ups                                                                      | 71          | No        |
| Ritvanen, T        | 2007             | Dynamic surface electromyographic responses in chronic low back pain treated by traditional bone setting and conventional physical therapy                                            | 61          | Yes       |
| Roche, G           | 2007             | Comparison of a functional restoration program with active individual physical therapy for patients with chronic low back pain: a randomized controlled trial                         | 132         | No        |
| Roche-Leboucher, G | 2011             | Multidisciplinary Intensive Functional Restoration Versus Outpatient Active Physiotherapy in Chronic Low Back Pain                                                                    | 131         | Yes       |



| Lead author    | Publication year | Title                                                                                                                                                                                | Sample size | Extracted |
|----------------|------------------|--------------------------------------------------------------------------------------------------------------------------------------------------------------------------------------|-------------|-----------|
| Sahin, N       | 2011             | Effectiveness of back school for treatment of pain and functional disability in patients with chronic low back pain: a randomized controlled trial                                   | 146         | Yes       |
| Santaella, K   | 2009             | Assessment of a Biofeedback Program to Treat Chronic Low Back Pain                                                                                                                   | 60          | Yes       |
| Schiltewolf, M | 2006             | Comparison of a biopsychosocial therapy (BT) with a conventional biomedical therapy (MT) of subacute low back pain in the first episode of sick leave: a randomized controlled trial | 61          | Yes       |
| Senna, M       | 2011             | Does Maintained Spinal Manipulation Therapy for Chronic Nonspecific Low Back Pain Result in Better Long-Term Outcome?                                                                | 88          | Yes       |
| Shankar, N     | 2011             | Autonomic status and pain profile in patients of chronic low back pain and following electro acupuncture therapy: A randomized controlled trial                                      | 60          | Yes       |
| Sherman, K     | 2011             | A Randomized Trial Comparing Yoga, Stretching, and a Self-care Book for Chronic Low Back Pain                                                                                        | 206         | Yes       |
| Shirado, O     | 2010             | Multicenter Randomized Controlled Trial to Evaluate the Effect of Home-Based Exercise on Patients With Chronic Low Back Pain                                                         | 175         | No        |
| Skljarevski, C | 2010             | Efficacy and Safety of Duloxetine in Patients With Chronic Low Back Pain                                                                                                             | 236         | No        |
| Skljarevski, V | 2009             | Maintenance of Effect of Duloxetine in Patients with Chronic Low Back Pain: A 41-week Uncontrolled, Dose-blinded Study                                                               | 177         | Yes       |
| Skljarevski, V | 2009             | A double-blind, randomized trial of duloxetine versus placebo in the management of chronic low back pain                                                                             | 404         | No        |
| Skljarevski, V | 2010             | Duloxetine Versus Placebo in Patients With Chronic Low Back Pain: A 12-Week, Fixed-Dose, Randomized, Double-Blind Trial                                                              | 401         | Yes       |
| Sorensen, P    | 2010             | An educational approach based on a non-injury model compared with individual symptom-based physical training in chronic LBP. A pragmatic, randomised trial with a one-year follow-up | 185         | Yes       |
| Steenstra, I   | 2006             | Economic Evaluation of a Multi-Stage Return to Work Program for Workers on Sick-Leave Due to Low Back Pain                                                                           | 196         | No        |
| Suen, L        | 2007             | Auriculotherapy on low back pain in the elderly                                                                                                                                      | 60          | Yes       |
| Suni J         | 2006             | Control of the Lumbar Neutral Zone Decreases Low Back Pain and Improves Self-Evaluated Work Ability                                                                                  | 92          | No        |
| Szczurko, O    | 2007             | Naturopathic Care for Chronic Low Back Pain: A Randomized Trial                                                                                                                      | 59          | No        |

| Lead author        | Publication year | Title                                                                                                                                                                              | Sample size | Extracted |
|--------------------|------------------|------------------------------------------------------------------------------------------------------------------------------------------------------------------------------------|-------------|-----------|
| Tefner, I          | 2011             | The effect of spa therapy in chronic low back pain: a randomized controlled, single-blind, follow-up study                                                                         | 37          | Yes       |
| Thomas K           | 2006             | Randomized controlled trial of a short course of traditional acupuncture with usual care for persistent non-specific low back pain                                                 | 215         | Yes       |
| Unsgaard-Tondel, M | 2010             | Motor Control Exercises, Sling Exercises, and General Exercises for Patients With Chronic Low Back Pain: A Randomized Controlled Trial With 1-Year Follow-up                       | 109         | Yes       |
| van der Roer, N    | 2008             | Intensive group training protocol versus guideline physiotherapy for patients with chronic low back pain: a randomised controlled trial                                            | 102         | No        |
| Vasseljen, O       | 2011             | Effect of Core Stability Exercises on Feed-Forward Activation of Deep Abdominal Muscles in Chronic Low Back Pain                                                                   | 87          | Yes       |
| Vong, S            | 2011             | Motivational Enhancement therapy in addition to physical therapy improves motivational factors and treatment outcomes in people with low back pain: A randomized controlled trial. | 76          | Yes       |
| Weiner, D          | 2008             | Efficacy of Percutaneous Electrical Nerve Stimulation and Therapeutic Exercise for Older Adults with Chronic Low Back Pain: A Randomized Controlled Trial                          | 184         | Yes       |
| Wetherell, J L     | 2011             | A randomized, controlled trial of acceptance and commitment therapy and cognitive-behavioral therapy for chronic pain                                                              | 99          | Yes       |
| Whitfill, T        | 2010             | Early Intervention Options for Acute Low Back Pain Patients: A Randomized Clinical Trial with One-Year Follow-Up Outcomes                                                          | 102         | Yes       |
| Williams, K        | 2009             | Evaluation of the Effectiveness and Efficacy of Iyengar Yoga Therapy on Chronic Low Back Pain                                                                                      | 90          | Yes       |
| Witt, C            | 2006             | Pragmatic randomized trial evaluating the clinical and economic effectiveness of Acupuncture for Chronic Low back Pain                                                             | 2594        | No        |
| Yildirim, Y        | 2010             | Relationship between learning strategies of patients and proper perception of the home exercise program with non-specific low back pain                                            | 26          | No        |
| Zaringhalam, J     | 2010             | Reduction of chronic non-specific low back pain: A randomised controlled clinical trial on acupuncture and baclofen                                                                | 80          | Yes       |
