# Supplementary material for: The effect of journal impact factor, reporting conflicts, and reporting funding sources, on standardized effect sizes in back pain trials: a systematic review and meta-regression
Source: PubMed Central journal article supplement (PMC4663726; doi:10.1186/s12891-015-0825-6), 2015-11-30
Supplement: 12891_2015_825_MOESM3_ESM.pdf [file 12891_2015_825_MOESM3_ESM.pdf]

**Table S2: Excluded study characteristics**

| Lead author  | Publication year | Title                                                                                                                                                                                                                                                | Reason for rejection                                          |
|--------------|------------------|------------------------------------------------------------------------------------------------------------------------------------------------------------------------------------------------------------------------------------------------------|---------------------------------------------------------------|
| Adamczyk, A  | 2009             | Effectiveness of holistic Physiotherapy for low back pain                                                                                                                                                                                            | Radiating pain                                                |
| Anon         | 2010             | Erratum: Efficacy and safety of tapentadol extended release for the management of chronic low back pain: results of a prospective, randomized, double-blind, placebo- and active-controlled Phase III study Expert Opin. Pharmacother. (2010) 11 (1) | Not a nsLBP RCT                                               |
| Ansari, N    | 2006             | A randomized, single blind placebo controlled clinical trial on the effect of continuous ultrasound on low back pain                                                                                                                                 | Non-English language                                          |
| Barker, K    | 2008             | Treatment of chronic back pain by sensory discrimination training. A Phase I RCT of a novel device (fairmed) vs. TENS                                                                                                                                | Non-inferiority trial                                         |
| Basler, H    | 2006             | TTM-based counselling in physiotherapy does not contribute to an increase of adherence to activity recommendations in older adults with chronic low back pain—a randomised controlled trial                                                          | Mixed sample (including pathology, pregnancy, neck, thoracic) |
| Belavy, D    | 2010             | Countermeasures against lumbar spine deconditioning in prolonged bed rest: resistive exercise with and without whole body vibration                                                                                                                  | Mixed sample (including pathology, pregnancy, neck, thoracic) |
| Bergholdt, K | 2008             | Better Backs by Better Beds?                                                                                                                                                                                                                         | Mixed sample (including pathology, pregnancy, neck, thoracic) |
| Bogefeldt, J | 2007             | Sick leave reductions from a comprehensive manual therapy programme for low back pain: the Gotland Low Back Pain Study                                                                                                                               | Radiating pain                                                |
| Bronfort, G  | 2011             | Supervised exercise, spinal manipulation, and home exercise for chronic low back pain: a randomized clinical trial                                                                                                                                   | Radiating pain                                                |
| Browder, A   | 2007             | Effectiveness of an Extension-Oriented Treatment Approach in a Subgroup of Subjects With Low Back Pain: A Randomized Clinical Trial                                                                                                                  | Radiating pain                                                |

| Lead author         | Publication year | Title                                                                                                                                                                                       | Reason for rejection                                          |
|---------------------|------------------|---------------------------------------------------------------------------------------------------------------------------------------------------------------------------------------------|---------------------------------------------------------------|
| Bruehl, S           | 2007             | Trait Anger Expressiveness and Pain-Induced Beta-Endorphin Release: Support for the Opioid Dysfunction Hypothesis                                                                           | Only objective or psychological outcomes                      |
| Bruehl, S           | 2008             | Anger Management Style and Emotional Reactivity to Noxious Stimuli Among Chronic Pain Patients and Healthy Controls: The Role of Endogenous Opioids                                         | Only objective or psychological outcomes                      |
| Buttagat, V         | 2011             | The immediate effects of traditional Thai massage on heart rate variability and stress-related parameters in patients with back pain associated with myofascial trigger points              | Mixed sample (including pathology, pregnancy, neck, thoracic) |
| Buynak, R           | 2009             | Dose Stability Of Tapentadol ER For The Relief Of Chronic Low Back Pain: Results Of A Randomized, Active And PlaceboControlled Study                                                        | Not a nsLBP RCT                                               |
| Cabitza, P          | 2008             | Efficacy and safety of eperisone in patients with low back pain: a double blind randomized study                                                                                            | Non-inferiority trial                                         |
| Casserley-Feeney, S | 2007             | The ACCESS trial – randomised controlled trial of public hospital-based versus private clinic-based physiotherapy for low back pain: clinical outcomes                                      | Multiple publication                                          |
| Cevik, R            | 2007             | Effect of new traction technique of prone position on distraction of lumbar vertebrae and its relation with different application of heating therapy in low back pain                       | Pilot or preliminary study                                    |
| Christiansen, S     | 2010             | A short goal-pursuit intervention to improve physical capacity: A randomized clinical trial in chronic back pain patients                                                                   | Mixed sample (including pathology, pregnancy, neck, thoracic) |
| Clark, D            | 2010             | Tolerance and opioid-induced hyperalgesia in clinical populations                                                                                                                           | Not a nsLBP RCT                                               |
| Cleland, J          | 2009             | Comparison of the Effectiveness of Three Manual Physical Therapy Techniques in a Subgroup of Patients With Low Back Pain Who Satisfy a Clinical Prediction Rule A Randomized Clinical Trial | Pilot or preliminary study                                    |

| Lead author    | Publication year | Title                                                                                                                                                                                                  | Reason for rejection                                          |
|----------------|------------------|--------------------------------------------------------------------------------------------------------------------------------------------------------------------------------------------------------|---------------------------------------------------------------|
| Codding, C     | 2009             | Efficacy and Safety Evaluation of 12 Weeks Extended-Release Hydrocodone/Acetaminophen Treatment in Patients with Chronic Low Back Pain (CLBP) by Prior Opioid Use                                      | Not a nsLBP RCT                                               |
| Cohen, S       | 2008             | Lumbar zygapophysial (facet) joint radiofrequency denervation success as a function of pain relief during diagnostic medial branch blocks: a multi-center analysis                                     | Not a nsLBP RCT                                               |
| Constantino, C | 2011             | Mesotherapy versus Systemic Therapy in the Treatment of Acute Low Back Pain: A Randomized Trial                                                                                                        | Referred pain below knee                                      |
| Cox, J         | 2009             | Letter to the Editor: A randomized controlled trial comparing 2 types of spinal manipulation and minimal conservative medial care for adults 55 years and older with subacute or chronic low back pain | Not a nsLBP RCT                                               |
| Critchley, D   | 2007             | Effectiveness and Cost-Effectiveness of Three Types of Physiotherapy Used to Reduce Chronic Low Back Pain Disability                                                                                   | Radiating pain                                                |
| Curnow, D      | 2009             | Altered motor control, posture and the Pilates method of exercise prescription                                                                                                                         | Mixed sample (including pathology, pregnancy, neck, thoracic) |
| Dagenais, S    | 2007             | Prolotherapy injections for chronic low-back pain (Review)                                                                                                                                             | Not a nsLBP RCT                                               |
| Day, I         | 2008             | Can Topical Anesthetic Reduce the Pain Associated with Diagnostic Blocks of the Lumbosacral Spine?                                                                                                     | Mixed sample (including pathology, pregnancy, neck, thoracic) |
| Demoulin, C    | 2006             | Benefits of a Physical Training Program After Back School for Chronic Low Back Pain Patients                                                                                                           | Not a nsLBP RCT                                               |
| Deshpande, A   | 2007             | Opioids for chronic low-back pain                                                                                                                                                                      | Not a nsLBP RCT                                               |
| Desmoulin, G   | 2007             | Initial results using Khan Kinetic Treatment(trademark) as a low back pain treatment option                                                                                                            | Mixed sample (including pathology, pregnancy, neck, thoracic) |
| Eisenberg, D   | 2007             | Addition of choice of complementary therapies to usual care for acute low back pain: a randomized controlled trial                                                                                     | Radiating pain                                                |
| Engers, A      | 2008             | Individual patient education for low back pain                                                                                                                                                         | Not a nsLBP RCT                                               |

| Lead author   | Publication year | Title                                                                                                                                                                                   | Reason for rejection                                          |
|---------------|------------------|-----------------------------------------------------------------------------------------------------------------------------------------------------------------------------------------|---------------------------------------------------------------|
| Etropolski, M | 2010             | Dose Conversion Between Tapentadol Immediate and Extended Release for Low Back Pain                                                                                                     | Crossover design                                              |
| Etropolski, M | 2009             | A randomized, double-blind, placebo- and active-con- trolled phase III study of tapentadol ER for chronic low back pain: analysis of efficacy endpoint sensitivity                      | Not a nsLBP RCT                                               |
| Evans, D      | 2010             | Characteristics and Predictors of Short-Term Outcomes in Individuals Self-selecting Yoga or Physical Therapy for Treatment of Chronic Low Back Pain                                     | Not a nsLBP RCT                                               |
| Facci, L      | 2011             | Effects of transcutaneous electrical nerve stimulation (TENS) and inter-ferential currents (IFC) in patients with nonspecific chronic low back pain: randomized clinical trial          | Radiating pain                                                |
| Fritz, J      | 2008             | Is There a Subgroup of Patients With Low Back Pain Likely to Benefit From Mechanical Traction?                                                                                          | Radiating pain                                                |
| Gatti, R      | 2011             | Efficacy of trunk balance exercises for individuals with chronic low back pain: a randomized clinical trial                                                                             | Mixed sample (including pathology, pregnancy, neck, thoracic) |
| George, S     | 2008             | A Randomized Trial of Behavioral Physical Therapy Interventions for Acute and Sub-Acute Low Back Pain                                                                                   | Referred pain below knee                                      |
| George, S     | 2011             | Brief psychosocial education, not core stabilization, reduced incidence of low back pain: results from the Pre-vention of Low Back Pain in the Military (POLM) cluster randomized trial | Not a nsLBP RCT                                               |
| George, S     | 2009             | Psychosocial education improves low back pain beliefs: results from a cluster randomized clinical trial (NCT00373009) in a primary preven-tion setting                                  | Not a nsLBP RCT                                               |
| George, S     | 2010             | Comparison of Graded Exercise and Graded Exposure Clinical Outcomes for Patients With Chronic Low Back Pain                                                                             | Not a nsLBP RCT                                               |
| Gould, E      | 2009             | The Pain Quality Response Profile of Oxymorphone Extended Release in the Treatment of Low Back Pain                                                                                     | Secondary report of RCT                                       |

| Lead author | Publication year | Title                                                                                                                                                                                                               | Reason for rejection                                          |
|-------------|------------------|---------------------------------------------------------------------------------------------------------------------------------------------------------------------------------------------------------------------|---------------------------------------------------------------|
| Guthrie, R  | 2011             | The Effect of Traditional Bridging or Suspension Exercise Bridging on Lateral Abdominal Thickness in Individuals with Low Back Pain                                                                                 | Only objective or psychological outcomes                      |
| Hale, M     | 2007             | Efficacy and Safety of OPANA ER (Oxymorphone Extended Release) for Relief of Moderate to Severe Chronic Low Back Pain in Opioid-Experienced Patients: A 12-Week, Randomized, Double-blind, placebo-controlled Study | Mixed sample (including pathology, pregnancy, neck, thoracic) |
| Hale, M     | 2010             | Once-daily OROS hydromorphone ER compared with placebo in opioid-tolerant patients with chronic low back pain                                                                                                       | Mixed sample (including pathology, pregnancy, neck, thoracic) |
| Hancock, M  | 2010             | Letter                                                                                                                                                                                                              | Not a nsLBP RCT                                               |
| Hasegawa, T | 2009             | Acupuncture for acute nonspecific low back pain: a randomized, controlled, placebo trial                                                                                                                            | Not a nsLBP RCT                                               |
| Helmhout, P | 2008             | Isolated lumbar extensor strengthening versus regular physical therapy in an army working population with nonacute low back pain: a randomized controlled trial                                                     | Not a nsLBP RCT                                               |
| Helmhout, P | 2010             | Prognostic factors for perceived recovery or functional improvement in non-specific low back pain: secondary analyses of three randomized clinical trials                                                           | Not a nsLBP RCT                                               |
| Henchos, Y  | 2010             | Cost-utility analysis of a three-month exercise programme vs usual care following multidisciplinary rehabilitation for chronic low back pain                                                                        | Not a nsLBP RCT                                               |
| Heymans, M  | 2006             | Does flexion-distraction help treat chronic low back pain?                                                                                                                                                          | Radiating pain                                                |
| Hides, J    | 2011             | Effect of Motor Control Training on Muscle Size and Football Games Missed from Injury                                                                                                                               | Not a nsLBP RCT                                               |
| Hlobil, H   | 2007             | Substantial sick-leave costs savings due to a graded activity intervention for workers with non-specific sub-acute low back pain                                                                                    | Secondary report of RCT                                       |

| Lead author     | Publication year | Title                                                                                                                                                                                                                                          | Reason for rejection                                          |
|-----------------|------------------|------------------------------------------------------------------------------------------------------------------------------------------------------------------------------------------------------------------------------------------------|---------------------------------------------------------------|
| Hollinghurst, S | 2008             | Randomised controlled trial of Alexander technique lessons, exercise, and massage (ATEAM) for chronic and recurrent back pain: economic evaluation                                                                                             | Secondary report of RCT                                       |
| Hurley, D       | 2009             | A walking programme and a supervised exercise class versus usual physiotherapy for chronic low back pain: a single-blinded randomised controlled trial. (The Supervised Walking In comparison to Fitness Training for Back Pain (SWIFT) Trial) | Pilot or preliminary study                                    |
| Hush, J         | 2006             | TENS of unknown value in the treatment of chronic low back pain                                                                                                                                                                                | Not a nsLBP RCT                                               |
| Ijzelenberg, H  | 2007             | Effectiveness of a back pain prevention program: A cluster randomized controlled trial in an occupational setting                                                                                                                              | Not a nsLBP RCT                                               |
| Ikegami, S      | 2010             | Anti-Nociceptive Effects of Elcatonin Injection for Postmenopausal Women with Back Pain: A Randomized Controlled Trial                                                                                                                         | Mixed sample (including pathology, pregnancy, neck, thoracic) |
| Inoue, M        | 2010             | Comparison of the effectiveness of acupuncture treatment and local anesthetic injection for low back pain: a randomized controlled trial.                                                                                                      | Mixed sample (including pathology, pregnancy, neck, thoracic) |
| Jans, M         | 2006             | Intermittent follow-up treatment with Cesar exercise therapy in patients with subacute or chronic aspecific low back pain: results of a randomized, controlled trial with a 1.5-year follow-up                                                 | Non-English language                                          |
| Kasis, A        | 2009             | Significantly Improved Outcomes With a Less Invasive Posterior Lumbar Interbody Fusion Incorporating Total Facetectomy                                                                                                                         | Mixed sample (including pathology, pregnancy, neck, thoracic) |
| Katz, N         | 2009             | Tanezumab, an Anti-Nerve Growth Factor (NGF) antibody, for the treatment of chronic low back pain (CLBP) - a randomized, controlled, double-blind, phase 2 trial                                                                               | Not a nsLBP RCT                                               |
| Katz, N         | 2007             | A 12-week, randomized, placebo-controlled trial assessing the safety and efficacy of oxymorphone extended release for opioidnaive patients with chronic low back pain                                                                          | Mixed sample (including pathology, pregnancy, neck, thoracic) |

| Lead author    | Publication year | Title                                                                                                                                                       | Reason for rejection                                          |
|----------------|------------------|-------------------------------------------------------------------------------------------------------------------------------------------------------------|---------------------------------------------------------------|
| Kavanagh, S    | 2009             | Tapentadol extended release (er) for chronic low back pain: results of euroqol-5 dimension (eq-5d) and short form-36 (sf-36) health status questionnaires   | Not a nsLBP RCT                                               |
| Kettenmann, B  | 2007             | Impact of Continuous Low Level Heatwrap Therapy in Acute Low Back Pain Patients: Subjective and Objective Measurements                                      | Mixed sample (including pathology, pregnancy, neck, thoracic) |
| Kool, J        | 2007             | Function-Centered Rehabilitation Increases Work Days in Patients With Nonacute Nonspecific Low Back Pain: 1-Year Results From a Randomized Controlled Trial | Only objective or psychological outcomes                      |
| Kovacs, F      | 2007             | A Comparison of Two Short Education Programs for Improving Low Back Pain-Related Disability in the Elderly                                                  | Mixed sample (including pathology, pregnancy, neck, thoracic) |
| Kulich, W      | 2006             | Additional outcome improvement in the rehabilitation of chronic low back pain after nuclear resonance therapy                                               | Mixed sample (including pathology, pregnancy, neck, thoracic) |
| Kulich, W      | 2006             | The effect of MBST-nuclearresonancetherapy with a complex 3-dimensional electromagnetic nuclear resonance field on patients with low back pain              | Mixed sample (including pathology, pregnancy, neck, thoracic) |
| Lamb, S        | 2010             | A multicentred randomised controlled trial of a primary care-based cognitive behavioural programme for low back pain. The Back Skills Training (best) trial | Multiple publication                                          |
| Lee, J         | 2010             | Therapeutic Trial of Fluoroscopic Interlaminar Epidural Steroid Injection for Axial Low Back Pain: Effectiveness and Outcome Predictors                     | Not a nsLBP RCT                                               |
| Lee, T         | 2011             | Pharmacologic treatment for low back pain: One component of pain care                                                                                       | Not a nsLBP RCT                                               |
| Leeuw, M       | 2008             | Exposure in vivo versus operant graded activity in chronic low back pain patients: Results of a randomized controlled trial                                 | Radiating pain                                                |
| Leichtfried, V | 2010             | Can bright light therapy ameliorate symptoms associated with low back pain (LBP)? A randomized controlled trial                                             | Not a nsLBP RCT                                               |

| Lead author   | Publication year | Title                                                                                                                                                                       | Reason for rejection                                          |
|---------------|------------------|-----------------------------------------------------------------------------------------------------------------------------------------------------------------------------|---------------------------------------------------------------|
| Lewis, C      | 2010             | A randomised controlled study examining the short-term effects of straincounterstrain treatment on quantitative sensory measures at digitally tender points in the low back | Crossover design                                              |
| Li, C         | 2008             | Analgesic efficacy and tolerability of flupirtine vs. Tramadol in patients with subacute low back pain: a double-blind multicentre trial                                    | Non-inferiority trial                                         |
| Liddle, D     | 2007             | Advice for the management of low back pain: A systematic review of randomised controlled trials                                                                             | Not a nsLBP RCT                                               |
| Limke, J      | 2008             | Randomized trial comparing the effects of one set vs two sets of resistance exercises for outpatients with chronic low back pain and leg pain                               | Radiating pain                                                |
| Lin, M        | 2010             | A comparison between pulsed radiofrequency and electroacupuncture for relieving pain in patients with chronic low back pain                                                 | Radiating pain                                                |
| Long, A       | 2008             | The comparative prognostic value of directional preference and centralization: A useful tool for front-line clinicians?                                                     | Secondary report of RCT                                       |
| Macfarlane, G | 2008             | Changing patient perceptions of their illness: Can they contribute to an improved outcome for episodes of musculoskeletal pain?                                             | Not a nsLBP RCT                                               |
| Magnusson, M  | 2008             | Motor Control Learning in Chronic Low Back Pain                                                                                                                             | Not a nsLBP RCT                                               |
| Mandara, A    | 2008             | A randomised controlled trial on the effectiveness of osteopathic manipulative treatment of chronic low back pain                                                           | Not a nsLBP RCT                                               |
| Mattila, R    | 2007             | The Effects of Lifestyle Intervention for Hypertension on Low Back Pain                                                                                                     | Mixed sample (including pathology, pregnancy, neck, thoracic) |
| Mehling, W    | 2006             | Breath therapy for chronic low back pain                                                                                                                                    | Not a nsLBP RCT                                               |
| Mehta, S      | 2009             | Evaluation of eperisone hydrochloride in the treatment of acute musculoskeletal spasm associated with low back pain: A randomized, double-blind, placebo-controlled trial   | Mixed sample (including pathology, pregnancy, neck, thoracic) |



| Lead author    | Publication year | Title                                                                                                                                                                                                                                   | Reason for rejection                                          |
|----------------|------------------|-----------------------------------------------------------------------------------------------------------------------------------------------------------------------------------------------------------------------------------------|---------------------------------------------------------------|
| Meng, K        | 2011             | Intermediate and Long-term Effects of a Standardized Back School for Inpatient Orthopedic Rehabilitation on Illness Knowledge and Self-management Behaviors                                                                             | Only objective or psychological outcomes                      |
| Mirovsky, Y    | 2006             | The effect of ambulatory lumbar traction combined with treadmill on patients with chronic low back pain                                                                                                                                 | Mixed sample (including pathology, pregnancy, neck, thoracic) |
| Miyazaki, S    | 2009             | Applicability of Press Needles to a Double-blind Trial A Randomized, Double-blind, Placebo-controlled Trial                                                                                                                             | Mixed sample (including pathology, pregnancy, neck, thoracic) |
| Murtezani, A   | 2011             | A comparison of high intensity aerobic exercise and passive modalities for the treatment of workers with chronic low back pain: a randomized, controlled trial                                                                          | Mixed sample (including pathology, pregnancy, neck, thoracic) |
| Najm, W        | 2008             | German acupuncture trials (GERAC) for chronic low back pain                                                                                                                                                                             | Not a nsLBP RCT                                               |
| Nath, S        | 2008             | Percutaneous Lumbar Zygapophysial (Facet) Joint Neurotomy Using Radiofrequency Current, in the Management of Chronic Low Back Pain                                                                                                      | Mixed sample (including pathology, pregnancy, neck, thoracic) |
| Nelson-Wong, E | 2010             | Changes in muscle activation patterns and subjective low back pain ratings during prolonged standing in response to an exercise intervention                                                                                            | Mixed sample (including pathology, pregnancy, neck, thoracic) |
| North, R       | 2007             | 2blackwell publishing inc spinal cord stimulation with interleaved pulses: a randomized, controlled trial                                                                                                                               | Mixed sample (including pathology, pregnancy, neck, thoracic) |
| O'Brien, N     | 2006             | Randomised, controlled trial comparing physiotherapy and Pilates in the treatment of ordinary low back pain                                                                                                                             | Not a nsLBP RCT                                               |
| O'Donnel, J    | 2009             | The Effectiveness of a Weak Opioid Medication versus a Cyclooxygenase-2 (COX-2) Selective Non-steroidal Anti-inflammatory Drug in Treating Flare-up of Chronic Low-back Pain: Results from Two Randomized, Double-blind, 6-week Studies | Not a nsLBP RCT                                               |

| Lead author  | Publication year | Title                                                                                                                                                                                                                                                | Reason for rejection                                          |
|--------------|------------------|------------------------------------------------------------------------------------------------------------------------------------------------------------------------------------------------------------------------------------------------------|---------------------------------------------------------------|
| Paatelma, M  | 2008             | Orthopaedic manual therapy, mckenzie method or advice only for low back pain in working adults: a randomized controlled trial with one year follow-up                                                                                                | Radiating pain                                                |
| Padua, R     | 2009             | Re (letter): A randomized study of back school in women with chronic low back pain. Quality of life at three, six, and twelve months follow-up.                                                                                                      | Not a nsLBP RCT                                               |
| Pareek, A    | 2009             | Aceclofenac-tizanidine in the treatment of acute low back pain: a double-blind, double-dummy, randomized, multicentric, comparative study against aceclofenac alone                                                                                  | Mixed sample (including pathology, pregnancy, neck, thoracic) |
| Pengel, L    | 2007             | Physiotherapist-directed exercise, advice, or both for subacute low back pain: a randomized trial                                                                                                                                                    | Radiating pain                                                |
| Peniston, J  | 2009             | Oxymorphone Extended Release for the Treatment of Chronic Low Back Pain: A Retrospective Pooled Analysis of Enriched-Enrollment Clinical Trial Data Stratified According to Age, Sex, and Prior Opioid Use                                           | Not a nsLBP RCT                                               |
| Perrot, S    | 2006             | Efficacy and Tolerability of Paracetamol/Tramadol (325 mg/37.5 mg) Combination Treatment Compared with Tramadol (50 mg) Monotherapy in Patients with Subacute Low Back Pain: A Multicenter, Randomized, Double-Blind, Parallel-Group, 10-Day Treatme | Not a nsLBP RCT                                               |
| Petersen, T  | 2011             | The mckenzie Method Compared With Manipulation When Used Adjunctive to Information and Advice in Low Back Pain Patients Presenting With Centralization or Peripheralization                                                                          | Mixed sample (including pathology, pregnancy, neck, thoracic) |
| Petersen, T  | 2007             | One-year follow-up comparison of the effectiveness of mckenzie treatment and strengthening training for patients with chronic low back pain: outcome and prognostic factors                                                                          | Radiating pain                                                |
| Petrofsky, J | 2008             | Improving the outcomes after back injury by a core muscle strengthening program                                                                                                                                                                      | Not a nsLBP RCT                                               |

| Lead author            | Publication year | Title                                                                                                                                                                                                                                                 | Reason for rejection                                          |
|------------------------|------------------|-------------------------------------------------------------------------------------------------------------------------------------------------------------------------------------------------------------------------------------------------------|---------------------------------------------------------------|
| Podichetty, V          | 2008             | Re: Oleske D M, Lavender S A, Andersson G B, et al. Are back supports plus education more effective than education alone in promoting recovery from low back pain? Results from a randomized clinical trial                                           | Not a nsLBP RCT                                               |
| Popovic, D             | 2009             | Lumbar Stimulation Belt for Therapy of Low-Back Pain                                                                                                                                                                                                  | Mixed sample (including pathology, pregnancy, neck, thoracic) |
| Portenoy, R            | 2007             | Fentanyl buccal tablet (FBT) for relief of breakthrough pain in opioid-treated patients with chronic low back pain: a randomized, placebo-controlled study                                                                                            | Referred pain below knee                                      |
| Pozo-Cruz, B           | 2011             | Effects of whole body vibration therapy on main outcome measures for chronic non-specific low back pain: a singleblind randomized controlled trial                                                                                                    | Pilot or preliminary study                                    |
| Pushpika Attanayake, A | 2010             | Clinical evaluation of selected yogic procedures in individuals with low back pain.                                                                                                                                                                   | Only objective or psychological outcomes                      |
| Quartana, P            | 2007             | Attentional strategy moderates effects of pain catastrophizing on symptom-specific physiological responses in chronic low back pain patients                                                                                                          | Mixed sample (including pathology, pregnancy, neck, thoracic) |
| Ralph, L               | 2009             | Improvement in Functional Status with Carisoprodol 250-mg Tablets in Patients with Acute Lower Back Spasm: A Randomized, Double-blind, Placebo-controlled Trial                                                                                       | Not a nsLBP RCT                                               |
| Ralph, L.              | 2008             | Double-blind, placebo-controlled trial of carisoprodol 250-mg tablets in the treatment of acute lower-back spasm                                                                                                                                      | Mixed sample (including pathology, pregnancy, neck, thoracic) |
| Rauck, R               | 2006             | A randomized, open-label study of once-a-day AVINZA (morphine sulfate extended-release capsules) versus twice-a-day oxycontin (oxycodone hydrochloride controlled release tablets) for chronic low back pain: the extension phase of the ACTION trial | Mixed sample (including pathology, pregnancy, neck, thoracic) |

| Lead author       | Publication year | Title                                                                                                                                                                                                                                                                                | Reason for rejection                                          |
|-------------------|------------------|--------------------------------------------------------------------------------------------------------------------------------------------------------------------------------------------------------------------------------------------------------------------------------------|---------------------------------------------------------------|
| Rauck, R          | 2006             | The ACTION study: a randomized, open-label, multicenter trial comparing once-a-day extended-release morphine sulfate capsules (AVINZA) to twice-a-day controlled release oxycodone hydrochloride tablets (oxycodone) for the treatment of chronic, moderate to severe low back pain. | Secondary report of RCT                                       |
| Rivero-Arias, O   | 2006             | Cost-Utility Analysis of Physiotherapy Treatment Compared With Physiotherapy Advice in Low Back Pain                                                                                                                                                                                 | Not a nsLBP RCT                                               |
| Romano, C         | 2009             | Pregabalin, celecoxib, and their combination for treatment of chronic low-back pain                                                                                                                                                                                                  | Mixed sample (including pathology, pregnancy, neck, thoracic) |
| Rusinyol, F       | 2009             | Effect of two different doses of eperisone in the treatment of acute low back pain                                                                                                                                                                                                   | Mixed sample (including pathology, pregnancy, neck, thoracic) |
| Ruth, M           | 2010             | Laser acupuncture for chronic back pain. A double-blind clinical study                                                                                                                                                                                                               | Non-English language                                          |
| Schimmel, J       | 2009             | No effect of traction in patients with low back pain: a single centre, single blind, randomized controlled trial of Intervertebral Differential Dynamics Therapy.                                                                                                                    | Mixed sample (including pathology, pregnancy, neck, thoracic) |
| Schmidt-Wilcke, T | 2006             | Affective components and intensity of pain correlate with structural differences in gray matter in chronic back pain patients                                                                                                                                                        | Not a nsLBP RCT                                               |
| Schwarz, I        | 2007             | Relative responsiveness of 3 different types of clinical outcome measures on chiropractic patients with low back pain                                                                                                                                                                | Not a nsLBP RCT                                               |
| Serfer, G         | 2010             | Randomized, double-blind trial of carisoprodol 250 mg compared with placebo and carisoprodol 350 mg for the treatment of low back spasm                                                                                                                                              | Mixed sample (including pathology, pregnancy, neck, thoracic) |
| Sertpoyraz, F     | 2009             | Comparison of isokinetic exercise versus standard exercise training in patients with chronic low back pain: a randomized controlled study                                                                                                                                            | Mixed sample (including pathology, pregnancy, neck, thoracic) |
| Shakoor, A        | 2010             | Evaluation of the effects of selective rehabilitation on the patients with chronic low back pain                                                                                                                                                                                     | Not a nsLBP RCT                                               |

| Lead author    | Publication year | Title                                                                                                                                                                                  | Reason for rejection                                          |
|----------------|------------------|----------------------------------------------------------------------------------------------------------------------------------------------------------------------------------------|---------------------------------------------------------------|
| Sherman, K     | 2010             | Treatment Expectations and Preferences as Predictors of Outcome of Acupuncture for Chronic Back Pain                                                                                   | Referred pain below knee                                      |
| Sherman, K     | 2009             | Characteristics of patients with chronic back pain who benefit from acupuncture                                                                                                        | Secondary report of RCT                                       |
| Shimoji, K     | 2007             | Pain relief by transcutaneous electric nerve stimulation with bidirectional modulated sine waves in patients with chronic back pain: a randomized, double-blind, sham-controlled study | Mixed sample (including pathology, pregnancy, neck, thoracic) |
| Shum, G        | 2006             | Movement coordination of the lumbar spine and hip during a picking up activity in low back pain subjects                                                                               | Not a nsLBP RCT                                               |
| Skljarevski, V | 2010             | Efficacy and safety of duloxetine 60 mg once-daily in patients with chronic low back pain                                                                                              | Mixed sample (including pathology, pregnancy, neck, thoracic) |
| Skljarevski, V | 2010             | Effect of Duloxetine 60mg Once Daily Versus Placebo in Patients with Chronic Low Back Pain: A 12-Week, Randomized, Double-Blind Trial                                                  | Not a nsLBP RCT                                               |
| Slater, M      | 2009             | Preventing Progression to Chronicity in First Onset, Subacute Low Back Pain: An Exploratory Study                                                                                      | Mixed sample (including pathology, pregnancy, neck, thoracic) |
| Smeets, R      | 2008             | Chronic low back pain: Physical training, graded activity with problem solving training, or both? The one-year post-treatment results of a randomized controlled trial                 | Not a nsLBP RCT                                               |
| Smeets, R      | 2006             | Reduction of Pain Catastrophizing Mediates the Outcome of Both Physical and Cognitive-Behavioral Treatment in Chronic Low Back Pain                                                    | Referred pain below knee                                      |
| Smeets, R      | 2009             | Do lumbar stabilising exercises reduce pain and disability in patients with recurrent low back pain?                                                                                   | Not a nsLBP RCT                                               |
| Smeets, R      | 2008             | Treatment expectancy and credibility are associated with the outcome of both physical and cognitive-behavioral treatment in chronic low back pain                                      | Not a nsLBP RCT                                               |

| Lead author   | Publication year | Title                                                                                                                                                                                                         | Reason for rejection                                          |
|---------------|------------------|---------------------------------------------------------------------------------------------------------------------------------------------------------------------------------------------------------------|---------------------------------------------------------------|
| Smeets, R     | 2006             | Active rehabilitation for chronic low back pain: Cognitive-behavioral, physical, or both? First direct post-treatment results from a randomized controlled trial                                              | Referred pain below knee                                      |
| Smith, A      | 2007             | The effect of the Feldenkrais method on pain and anxiety in people experiencing chronic low back pain                                                                                                         | Pilot or preliminary study                                    |
| Sokunbi, O    | 2007             | Changes in plasma concentration of serotonin in response to spinal stabilisation exercises in chronic low back pain patient                                                                                   | Only objective or psychological outcomes                      |
| Soonawalla, D | 2008             | Efficacy of thicolchicoside in Indian patients suffering from low back pain associated with muscle spasm                                                                                                      | Mixed sample (including pathology, pregnancy, neck, thoracic) |
| Steenstra, I  | 2006             | The effectiveness of graded activity for low back pain in occupational healthcare                                                                                                                             | Radiating pain                                                |
| Steiner, D    | 2011             | Efficacy and Safety of the Seven-Day Buprenorphine Transdermal System in Opioid-Naive Patients with Moderate to Severe Chronic Low Back Pain: An Enriched, Randomized, Double-Blind, Placebo-Controlled Study | Radiating pain                                                |
| Steiner, D    | 2011             | Efficacy and Safety of Buprenorphine Transdermal System (BTDS) for Chronic Moderate to Severe Low Back Pain: A Randomized, Double-Blind Study                                                                 | Radiating pain                                                |
| Steiner, D    | 2009             | The efficacy and safety of buprenorphine transdermal system (BTDS) in subjects with moderate to severe low back pain: A double-blind study                                                                    | Mixed sample (including pathology, pregnancy, neck, thoracic) |
| Sutlive, T    | 2009             | Comparison of short-term response to two spinal manipulation techniques for patients with low back pain in a military beneficiary population.                                                                 | Mixed sample (including pathology, pregnancy, neck, thoracic) |
| Tavafian, S   | 2008             | A Randomized Study of Back School in Women With Chronic Low Back Pain                                                                                                                                         | Mixed sample (including pathology, pregnancy, neck, thoracic) |

| Lead author  | Publication year | Title                                                                                                                                                                                | Reason for rejection                                          |
|--------------|------------------|--------------------------------------------------------------------------------------------------------------------------------------------------------------------------------------|---------------------------------------------------------------|
| Tavafian, S  | 2011             | Treatment of Chronic Low Back Pain A Randomized Clinical Trial Comparing Multidisciplinary Group-based Rehabilitation Program and Oral Drug Treatment With Oral Drug Treatment Alone | Radiating pain                                                |
| Tavafian, S  | 2007             | Low back pain education and short term quality of life: a randomized trial                                                                                                           | Mixed sample (including pathology, pregnancy, neck, thoracic) |
| Tekur, P     | 2008             | Effect of Short-Term Intensive Yoga Program on Pain, Functional Disability, and Spinal Flexibility in Chronic Low Back Pain: A Randomized Control Study                              | Radiating pain                                                |
| Tekur, P     | 2010             | Effect of yoga on quality of life of CLBP patients: A randomized control study                                                                                                       | Radiating pain                                                |
| Tilbrook, H  | 2011             | Yoga for Chronic Low Back Pain                                                                                                                                                       | Mixed sample (including pathology, pregnancy, neck, thoracic) |
| Tsao, H      | 2007             | Immediate changes in feedforward postural adjustments following voluntary motor training                                                                                             | Only objective or psychological outcomes                      |
| Underwood, M | 2011             | Predicting Response to a Cognitive-Behavioral Approach to Treating Low Back Pain: Secondary Analysis of the best Data Set                                                            | Not a nsLBP RCT                                               |
| Vasseljen, O | 2010             | Abdominal muscle contraction thickness and function after specific and general exercises: A randomized controlled trial in chronic low back pain patients                            | Only objective or psychological outcomes                      |
| Warming, S   | 2008             | Little effect of transfer technique instruction and physical fitness training in reducing low back pain among nurses: a cluster randomised intervention study                        | Not a nsLBP RCT                                               |
| Westrom, K   | 2010             | Individualized chiropractic and integrative care for low back pain: the design of a randomized clinical trial using a mixed-methods approach                                         | Pilot or preliminary study                                    |
| Wheeler, W   | 2010             | Functional status of patients with acute low back pain following treatment with carisoprodol 250-mg tablets assessed by the roland-morris disability questionnaire (RMDQ)            | Not a nsLBP RCT                                               |

| Lead author         | Publication year | Title                                                                                                                                                             | Reason for rejection                                          |
|---------------------|------------------|-------------------------------------------------------------------------------------------------------------------------------------------------------------------|---------------------------------------------------------------|
| Whitehurst, D       | 2007             | A Brief Pain Management Program Compared With Physical Therapy for Low Back Pain: Results From an Economic Analysis Alongside a Randomized Clinical Trial         | Secondary report of RCT                                       |
| Wilkey, A           | 2008             | A Comparison Between Chiropractic Management and Pain Clinic Management for Chronic Low-Back Pain in a National Health Service Outpatient Clinic                  | Radiating pain                                                |
| Wilson-MacDonald, J | 2008             | The MRC spine stabilization trial: surgical methods, outcomes, costs, and complications of surgical stabilization                                                 | Mixed sample (including pathology, pregnancy, neck, thoracic) |
| Worth, S            | 2007             | Real-time ultrasound feedback and abdominal hollowing exercises for people with low back pain                                                                     | Only objective or psychological outcomes                      |
| Yakhno, N           | 2006             | Analgesic Efficacy and Safety of Lornoxicam Quick-Release Formulation Compared with Diclofenac Potassium Randomised, Double-Blind Trial in Acute Low Back Pain    | Non-inferiority trial                                         |
| Zaina, F            | 2010             | Clinical and kinematic evaluation of osteopathy vs specific exercises in obese non-specific chronic low back pain females patients: a randomized controlled trial | Not a nsLBP RCT                                               |
